# Supplementary material for: Saltwater exposure accelerates ice grain growth and may increase fracture vulnerability
Source: Copernicus journal article supplement (doi:10.5194/egusphere-2025-6040), 2025-12-10
Supplement: Supplementary file 1 [file egusphere-2025-6040-supplement.pdf]

## Supplementary Materials for

### **Saltwater exposure accelerates ice grain growth and may increase fracture vulnerability**

**Authors:** Cassandra Seltzer<sup>1,2\*</sup>, Christine McCarthy<sup>1</sup>, Andrew J. Cross<sup>2</sup>, Michelle Berkmans<sup>1,3</sup>, Noah Walls<sup>4</sup>, Joanna D. Millstein<sup>5</sup>

\*Corresponding author: [cassandraseltzer@gmail.com](mailto:cassandraseltzer@gmail.com)

#### **The PDF file includes:**

Supplementary Text  
Figs. S1 to S8  
Table S1

## Supplementary text

25

### Calculation of liquidus curves.

Our results revealed that the grain-growth parameter  $k$  for saline ice can be expressed by  

$$k_{im}(f_M, V_L, T) = \exp(A * (1 - f_M) * (V_L + 1)^B) * k_{pure} * \exp\left(-\frac{Q}{RT}\right), \quad (Eq. S1)$$

$$V_L(x, T, T_e) = \frac{T_L(x) - T}{T - T_e}, \quad (Eq. S2)$$

30 where  $x$  is chloride salinity as a weight fraction,  $T_L(x)$  is the liquidus temperature at a given composition,  $T$  is temperature in Kelvin,  $T_e$  is the eutectic temperature of a chloride system in Kelvin,  $k_{0_{pure}}$  is  $6.19 \times 10^{-8} \text{ m}^4/\text{s}$  and  $Q$  is  $68 \pm 47 \text{ kJ}$ , following (Wang et al., 2024). An example of calculating the melt fraction and  $V_L$ , the vertical lever (McCarthy et al., 2019) is shown in Figure S1B.

35 The liquidus temperature at a given composition is calculated following a modified method from (Lamas et al., 2022), such that

$$T_L(x_m, T) = 273.15 - 1.998v x_m - b x_m^{1.5} - c x_m^2, \quad (Eq. S3)$$

where  $x_m$  is concentration in molality,  $v$  is the number of ions per mol of the salt inclusion, and  $b$  and  $c$  are observationally derived.

We use the following parameters for the three salts considered in our models:

40

|       | $v$ | $b$   | $c$  |
|-------|-----|-------|------|
| NaCl  | 2   | -1.45 | 0.75 |
| KCl   | 2   | -1.6  | 0.75 |
| MgSO4 | 2   | -2.2  | 0.65 |

lightly modified from (Lamas et al., 2022) to more accurately replicate experimentally-derived eutectic points (Fortes & Choukroun, 2010) as shown in Figure S5.

45

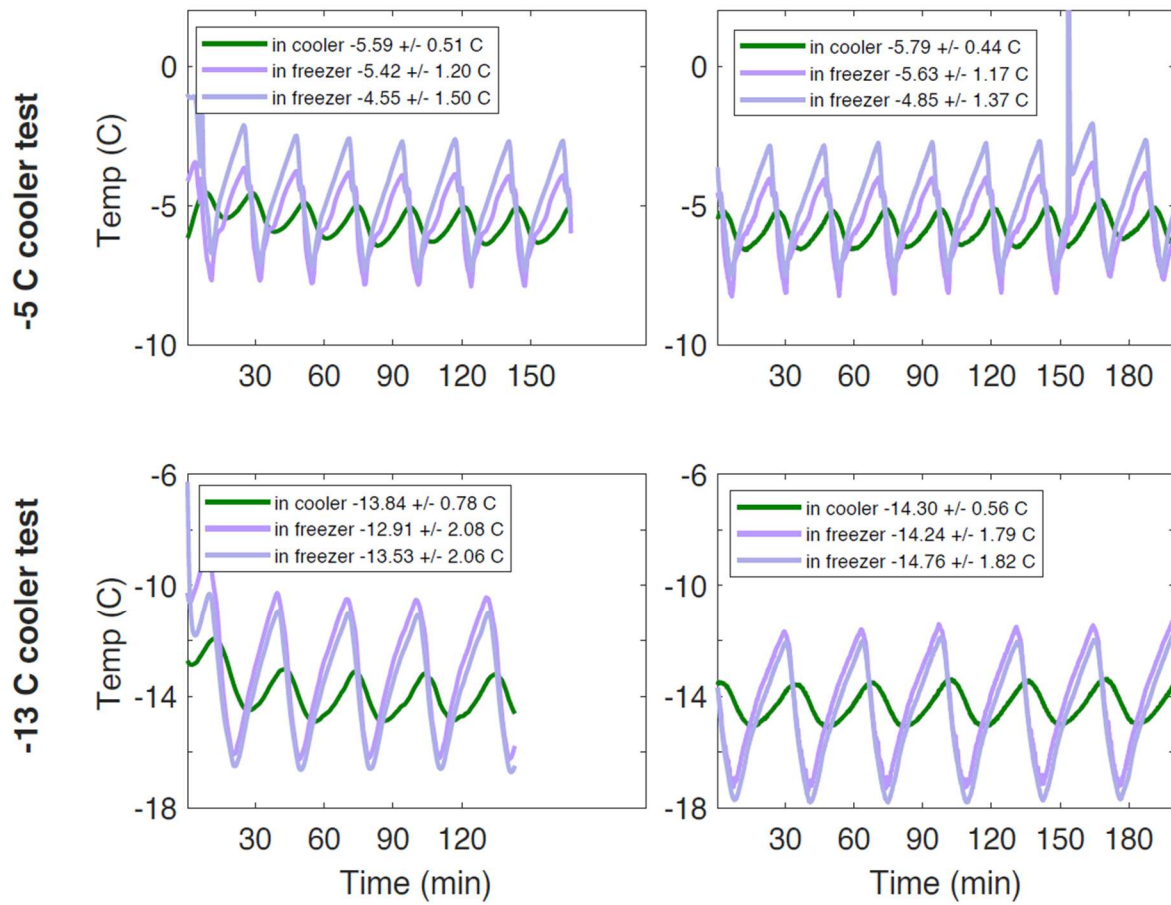

**Fig. S1.**

50 Freezer testing. Green line in all cases represents the temperature within a custom-built cooler. Two tests were conducted in each freezer, represented by each column.

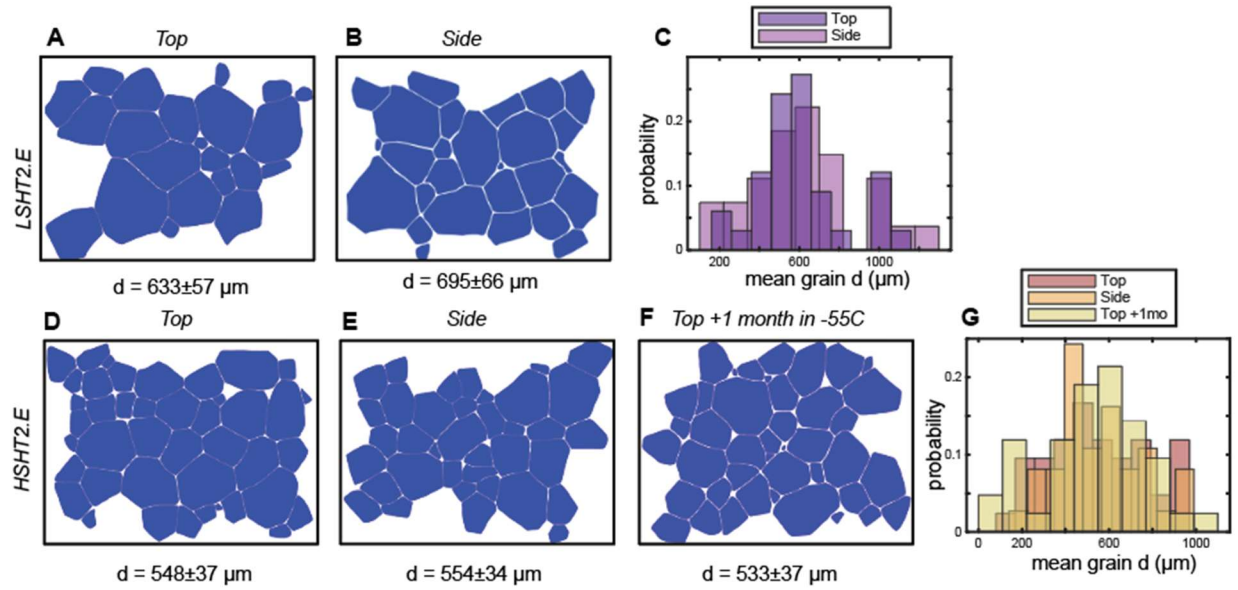

**Fig. S2.**

55 Comparison of grain size from multiple angles of sample. Tracings from (A) top of sample LSHT2.E, (B) side of sample LSHT2.E, and (C) histogram of grain sizes from A-B. (D) Tracings from top of sample HSHT2.E, (E) tracings from side of sample 2.E, (F) tracings from side of sample HSHT2.E after a month of being left in the -55 freezer, where no grain growth should have occurred, (G) histogram of grain sizes from D-F.

60

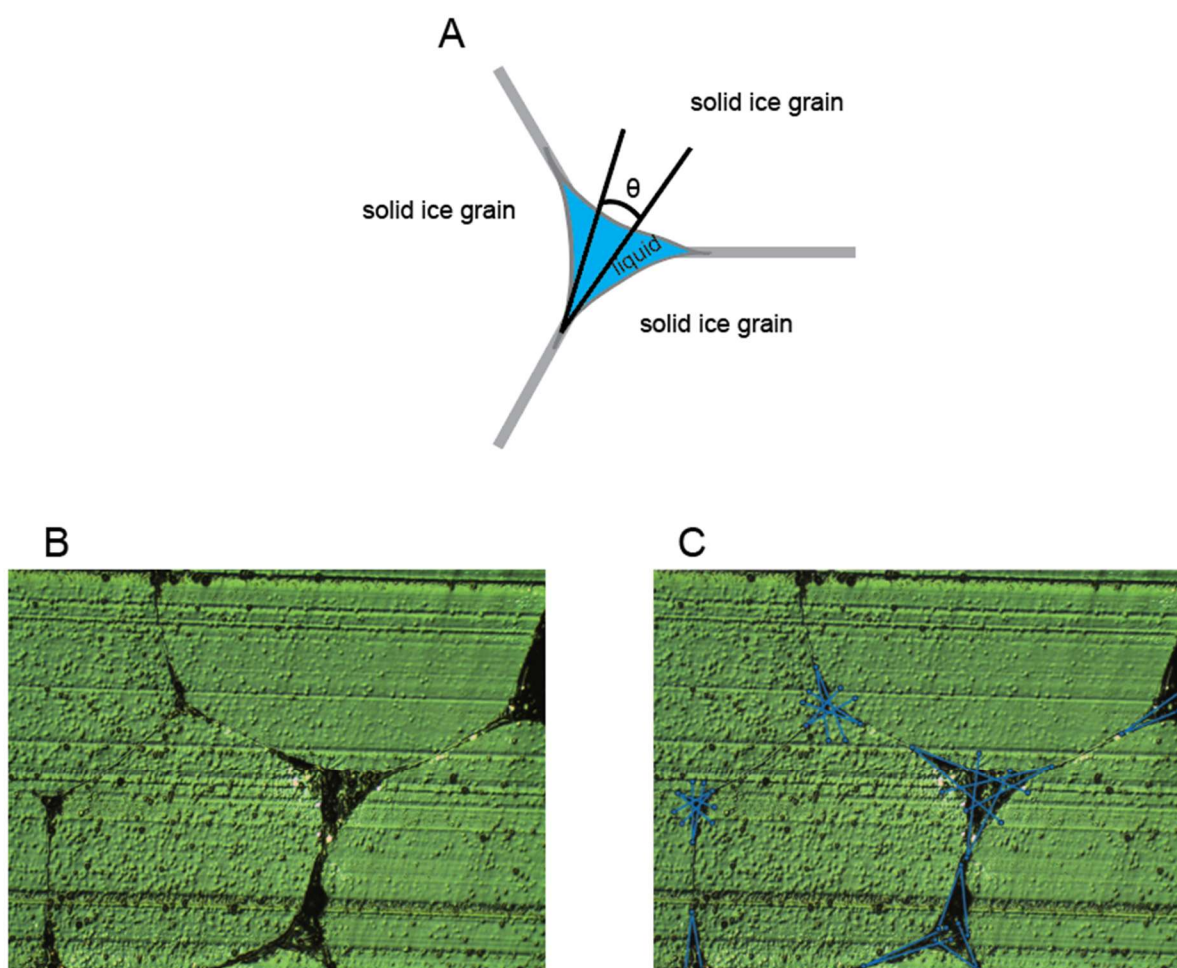

**Fig. S3.**

(A) Schematic of dihedral angle measurement in a theoretical system. (B) 10x image of LSLT2.E (C) Dihedral angle measurements of image.

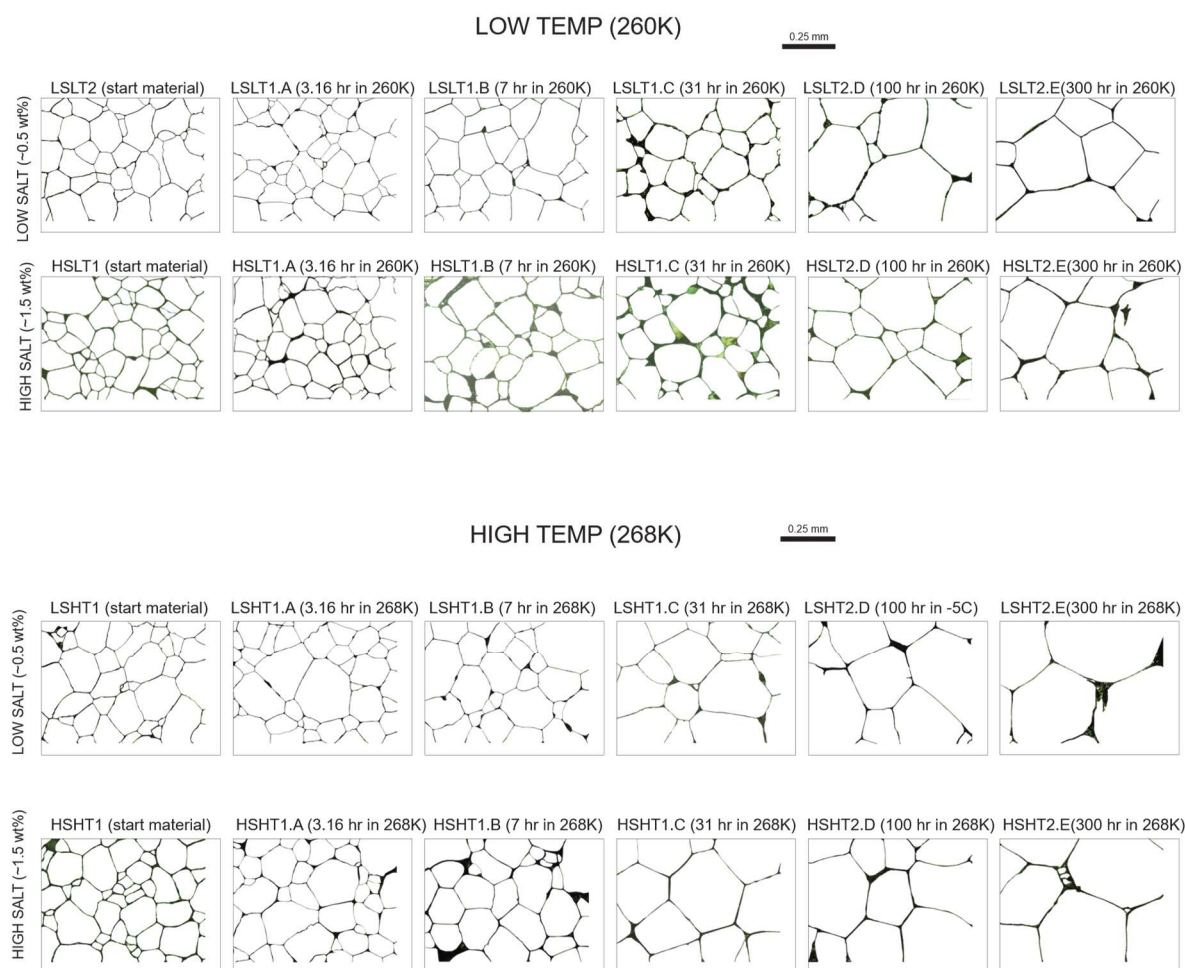

**Fig. S4.**

70

Traced grain boundaries from experimental grain growth series at low (top, 260K) and high (bottom, 268K) temperature. All grains are shown at same magnification.

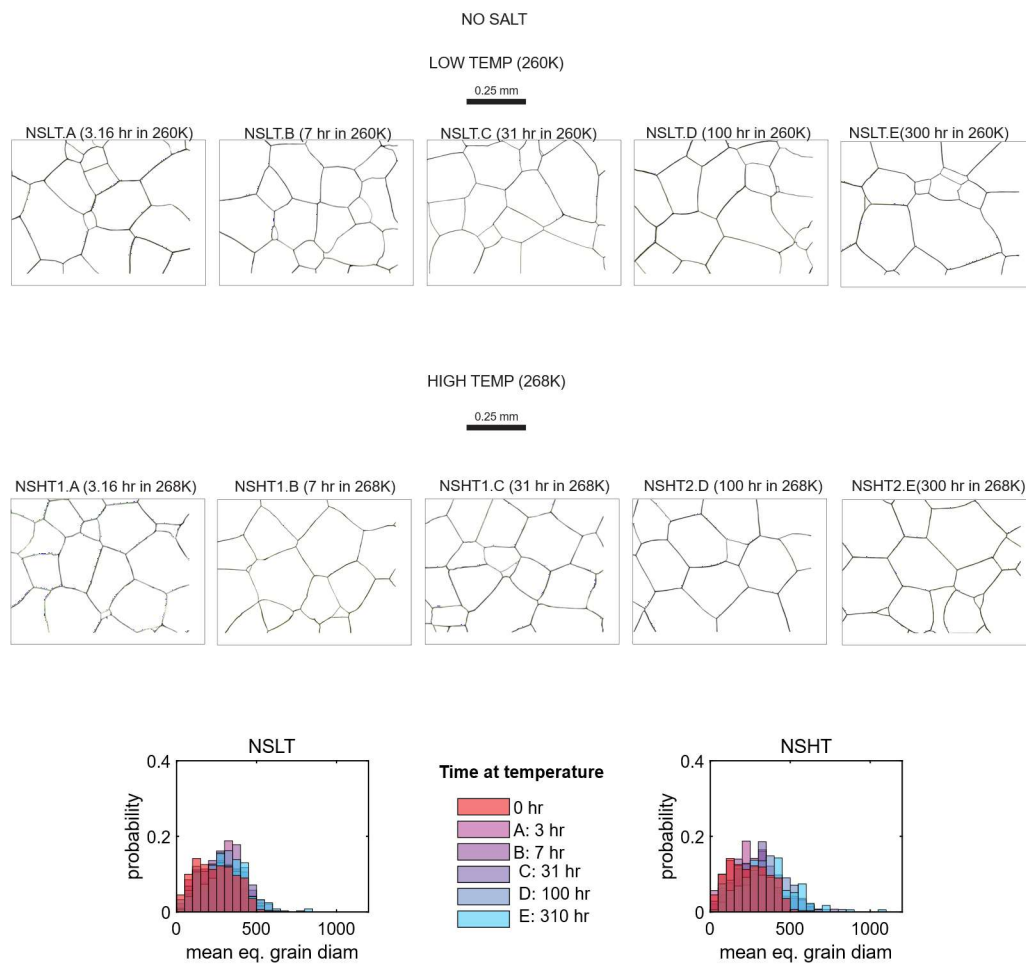

75 **Fig. S5.** Traced grain images from no-salt experiments at low (260K, top) and high (268K, bottom) temperatures. Histograms from both experimental series are shown in the last row.

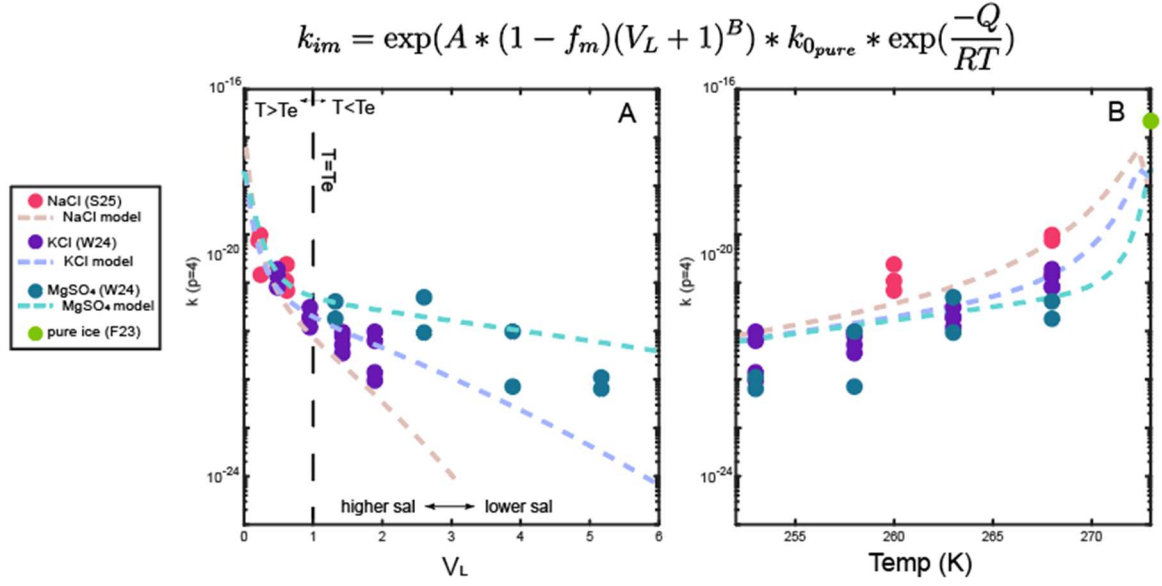

80 **Fig. S6.** Modeled equation (6) from main text applied to three different  $H_2O$ -salt systems. S25 indicates this work, W24 and F23 from (Fan et al., 2023; Wang et al., 2024), respectively. **(A)**  $k_{im}$  as a function of vertical lever (Fig. S1). **(B)**  $k_{im}$  as a function of temperature.



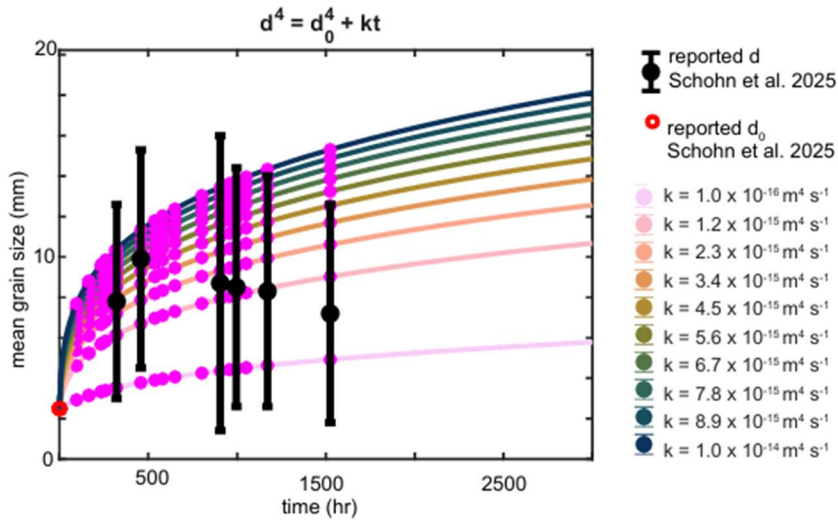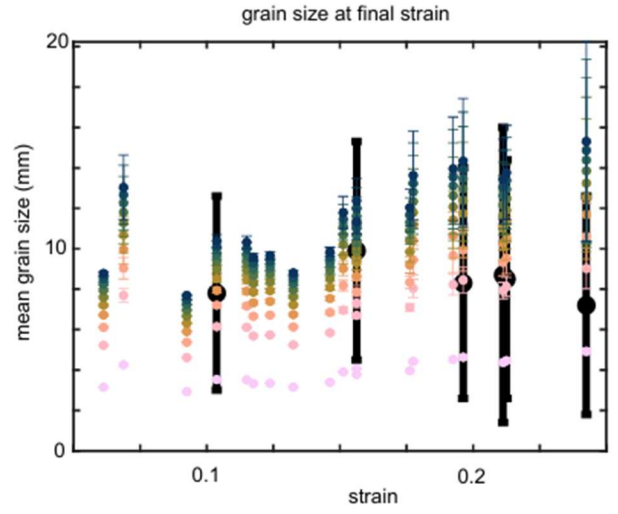

85

**Fig. S7.**

Reported final grain sizes (black) from Schohn et al, 2025, against theoretical grain-growth curves with variable range of  $k$  values and  $p=4$ .

90

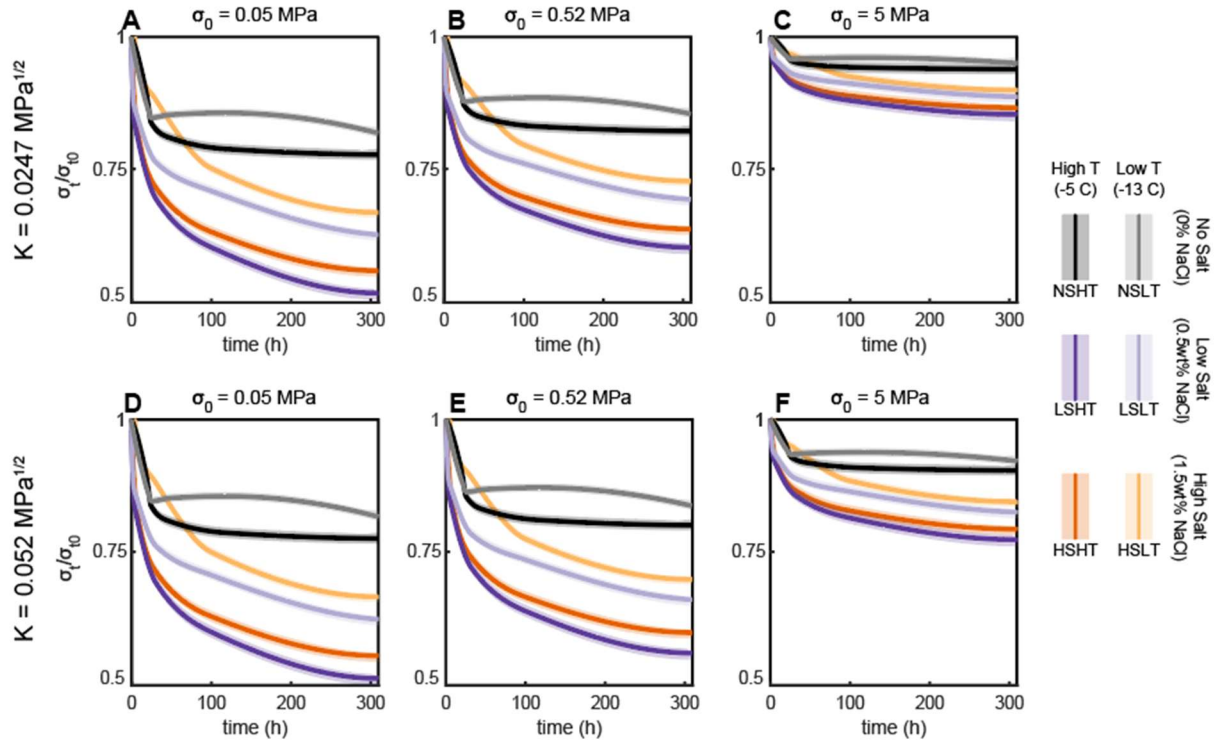

**Fig. S8.**

Effective tensile strength of ices exposed to warm water or saltwater, using a value of (A- C)  $K = 0.0247 \text{ MPa}^{\frac{1}{2}}$ , on initial tensile strength ( $\sigma_0$ ) values of (A) 0.05 MPa, (B) 0.52 MPa, and (C) 5 MPa, and normalized to the strength before water infiltration, or (D - F)  $K = 0.052 \text{ MPa}^{\frac{1}{2}}$ , on initial tensile strength ( $\sigma_0$ ) values of (D) 0.05 MPa, (E) 0.52 MPa, and (F) 5 MPa. Each line shows a mean value with one standard deviation above and below.

| LOW TEMPERATURE (268 K)  |       |        |                          |        |        |        |               |       |                          |        |        |        |        |
|--------------------------|-------|--------|--------------------------|--------|--------|--------|---------------|-------|--------------------------|--------|--------|--------|--------|
| LOW SALT                 |       |        |                          |        |        |        | HIGH SALT     |       |                          |        |        |        |        |
| LSLT1                    | LSLT2 | LSLT1A | LSLT1B                   | LSLT1C | LSLT2D | LSLT2E | HSLT1         | HSLT2 | HSLT1A                   | HSLT1B | HSLT1C | HSLT2D | HSLT2E |
| -                        | -     | 3.16   | 7                        | 31.6   | 100    | 310    | -             | -     | 3.16                     | 7      | 31.6   | 100    | 310    |
| Duration (hr)            |       |        |                          |        |        |        | Duration (hr) |       |                          |        |        |        |        |
| mean deq (µm)            | 193.3 | 183.7  | 198.2                    | 206.3  | 266.13 | 311.5  | 138.4         | 138.4 | 143.9                    | 165.9  | 195.9  | 257.2  | 359.8  |
| error                    | 4.9   | 5.74   | 5.27                     | 6.5    | 11.9   | 15.4   | 7.3           | 7.27  | 4.6                      | 7.13   | 6.4    | 10.9   | 19.1   |
| n grains                 | 883   | 738    | 880                      | 692    | 274    | 332    | 284           | 284   | 941                      | 446    | 735    | 374    | 315    |
| best p                   |       |        | 4.34                     |        |        |        |               |       | 3.09                     |        |        |        |        |
| k (p = 4)                |       |        | 2.43 x 10 <sup>-20</sup> |        |        |        |               |       | 1.07 x 10 <sup>-20</sup> |        |        |        |        |
| HIGH TEMPERATURE (268 K) |       |        |                          |        |        |        |               |       |                          |        |        |        |        |
| LOW SALT                 |       |        |                          |        |        |        | HIGH SALT     |       |                          |        |        |        |        |
| LSHT1                    | LSHT2 | LSHT1A | LSHT1B                   | LSHT1C | LSHT2D | LSHT2E | HSHT1         | HSHT2 | HSHT1A                   | HSHT1B | HSHT1C | HSHT2D | HSHT2E |
| -                        | -     | 3.16   | 7                        | 31.6   | 100    | 310    | -             | -     | 3.16                     | 7      | 31.6   | 100    | 310    |
| Duration (hr)            |       |        |                          |        |        |        | Duration (hr) |       |                          |        |        |        |        |
| mean deq (µm)            | 165   | 177.9  | 208.5                    | 230.5  | 325.75 | 442.8  | 141.7         | 132.9 | 184.9                    | 221.1  | 305.9  | 374.6  | 524    |
| standard error           | 6.08  | 6.86   | 6.15                     | 10.1   | 18.5   | 27.9   | 8.22          | 5.05  | 7.8                      | 8.1    | 12.1   | 20.4   | 29.2   |
| n grains                 | 714   | 582    | 727                      | 337    | 229    | 225    | 274           | 710   | 372                      | 372    | 310    | 299    | 262    |
| best p                   |       |        | 3.52                     |        |        |        |               |       | 4.31                     |        |        |        |        |
| k (p = 4)                |       |        | 9.51 x 10 <sup>-20</sup> |        |        |        |               |       | 6.82 x 10 <sup>-20</sup> |        |        |        |        |
| HIGH TEMPERATURE (268 K) |       |        |                          |        |        |        |               |       |                          |        |        |        |        |
| NSHTA                    | NSHTB | NSHTC  | NSHTD                    | NSHTE  |        |        |               |       |                          |        |        |        |        |
| 3.16                     | 7     | 31.6   | 100                      | 310    |        |        |               |       |                          |        |        |        |        |
| 274.4                    | 290.7 | 305.4  | 334.3                    | 330.5  |        |        |               |       |                          |        |        |        |        |
| 13                       | 18.3  | 15.3   | 17.4                     | 16.7   |        |        |               |       |                          |        |        |        |        |
| 333                      | 230   | 333    | 273                      | 336    |        |        |               |       |                          |        |        |        |        |
| best p                   |       |        | 12.79                    |        |        |        |               |       |                          |        |        |        |        |
| k (p = 4)                |       |        | n/a                      |        |        |        |               |       |                          |        |        |        |        |

**Table S1.**

Summary of experimental grain growth data on ice with (HS, LS) and without (NS) saltwater present.

105
